# Supplementary material for: How are we measuring physical activity and sedentary behaviour in the four home nations of the UK? A narrative review of current surveillance measures and future directions
Source: Br J Sports Med. 2019 May 22;54(21):1269–76. doi: 10.1136/bjsports-2018-100355 (PMC7116237; doi:10.1136/bjsports-2018-100355)
Supplement: Supplementary data [file bjsports-2018-100355supp002.pdf]

**Supplementary Table 2** Questions on compliance to the 2011 child MVPA recommendation in national surveys since 2008.

| Country            | Survey                                           | Year |      |      |      |      |      |      |      |      |      | Description of alternative method 'B'                                                                                                                                                                                      |
|--------------------|--------------------------------------------------|------|------|------|------|------|------|------|------|------|------|----------------------------------------------------------------------------------------------------------------------------------------------------------------------------------------------------------------------------|
|                    |                                                  | 2017 | 2016 | 2015 | 2014 | 2013 | 2012 | 2011 | 2010 | 2009 | 2008 |                                                                                                                                                                                                                            |
| England            | Health Survey for England[1]                     | ?    | X    | A+B  | X    | X    | A    | X    | X    | X    | A    | In 2015, 13-15 year olds were asked the Health Behaviour in School-Aged Children questions as part of the self-administered questionnaire. In 2008, accelerometry was piloted on a subsample of those over 4 years of age. |
|                    | Active Lives: Children and Young People[2]       | A    |      |      |      |      |      |      |      |      |      |                                                                                                                                                                                                                            |
| Northern Ireland   | Young Persons' Behaviour and Attitudes Survey[3] |      | A    |      |      | A    |      |      | A    |      |      |                                                                                                                                                                                                                            |
|                    | Continuous Household Survey[4]                   | ?    | A    | A    | A    | A    | X    | X    | X    | X    | X    |                                                                                                                                                                                                                            |
| Scotland           | Scottish Health Survey[5]                        | A    | A    | A    | A    | A    | A    | A    | A    | A    | A    | In 2017, the responses to the questionnaire were amended so that the durations of activities were reported on specific days in the last week, rather than the total frequency/average session duration.                    |
| Wales              | Welsh Health Survey[6]                           |      |      | A    | A    | A    | A    | A    | A    | A    | A    | Very similar questions used in the Welsh Health Survey for parents of 4-12 year olds but it was self-administered not interviewer-led.                                                                                     |
|                    | National Survey for Wales[7]                     | A    | A    |      |      |      |      |      |      |      |      |                                                                                                                                                                                                                            |
| England, Scotland, | Health Behaviour in School-Aged                  |      |      |      | A    |      |      |      | A    |      |      |                                                                                                                                                                                                                            |

Wales Children[8]

---

MVPA: moderate-to-vigorous physical activity. A: Used a comparable method (with tolerance to minor questionnaire changes) to those described in Table 3. B: Used an alternative method to measure compliance to the 2011 child MVPA recommendation (descriptions included in table). X: No measure of meeting the 2011 child MVPA recommendation included in the survey. Blank: Survey not run. ? indicates documentation not yet published.

### Supplementary Table 2 references

- 1 UK Data Service. Health Survey for England 2018. Available from: [beta.ukdataservice.ac.uk/datacatalogue/series/series?id=2000021](https://beta.ukdataservice.ac.uk/datacatalogue/series/series?id=2000021) Archived at: <http://www.webcitation.org/72e444sR1>.
- 2 Sport England. The Active Lives: Children and Young People Survey - Questionnaire content. London, UK: Sport England; 2018. <https://www.sportengland.org/media/13277/active-lives-children-and-young-people-survey-questionnaire-overview.pdf> Archived at: <http://www.webcitation.org/7315mwYvd>
- 3 Department of Health. Young persons behaviour and attitudes surveys 2014. Available from: <https://www.health-ni.gov.uk/publications/young-persons-behaviour-and-attitudes-surveys>.
- 4 Northern Ireland Statistics and Research Agency. Continuous Household Survey documents. 2017. <https://www.nisra.gov.uk/publications/chs-survey-documents>
- 5 Scottish Government. Scottish Health Survey: Reports and publications 2018. Available from: <https://www.gov.scot/Topics/Statistics/Browse/Health/scottish-health-survey/Publications> Archived at: <http://www.webcitation.org/72e56q8aS>.
- 6 Welsh Government. Welsh Health Survey: Past releases 2016. Available from: <https://gov.wales/statistics-and-research/welsh-health-survey/?tab=previous&lang=en> Archived at: .
- 7 Welsh Government. National Survey for Wales Design and Methodology 2018. Available from: <http://gov.wales/statistics-and-research/national-survey/design-methodology/?lang=en> Archived at: <http://www.webcitation.org/72NnN7RpJ>.
- 8 Currie C, Van der Sluijs W, Whitehead R, et al. Health Behaviour in School-Aged Children 2014 Survey in Scotland National Report. University of St Andrews, UK: Child and Adolescent Health Research Unit (CAHRU); 2015. [http://www.cahru.org/content/03-publications/04-reports/hbsc\\_nr14\\_interactive\\_final.pdf](http://www.cahru.org/content/03-publications/04-reports/hbsc_nr14_interactive_final.pdf) Archived at: <http://www.webcitation.org/72NlIUq7q>
